# Supplementary material for: Lactobacillus paracasei PS23 improves cognitive deficits via modulating the hippocampal gene expression and the gut microbiota in d-galactose-induced aging mice
Source: Royal Society of Chemistry journal article supplement (doi:10.1039/d2fo00165a), 2022-01-01
Supplement: d2fo00165a1.pdf [file d2fo00165a1.pdf]

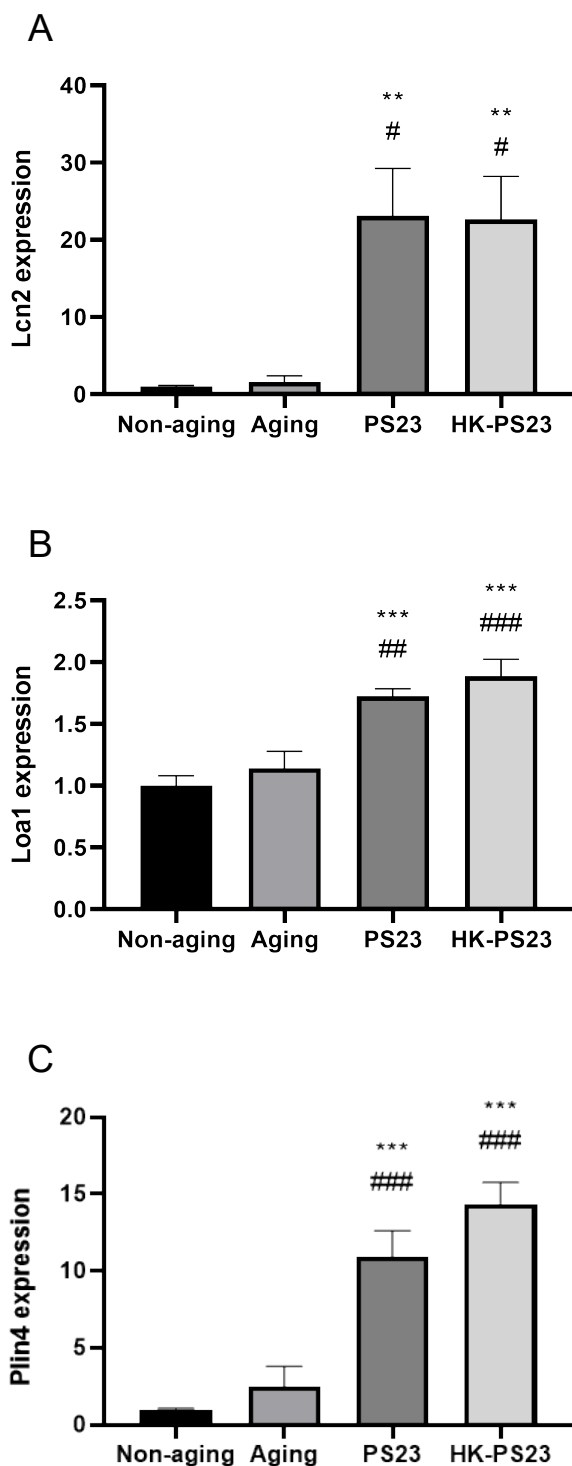

The hippocampal mRNA expression of Lcn2 (A), Lao1 (B), and Plin4 (C) in different group. N = 6, \*\*p < 0.01; \*\*\*p < 0.001 as compared with non-aging group. #p < 0.05; ##p < 0.01; ###p < 0.001 as compared with aging group. Data are represented as mean ± SEM

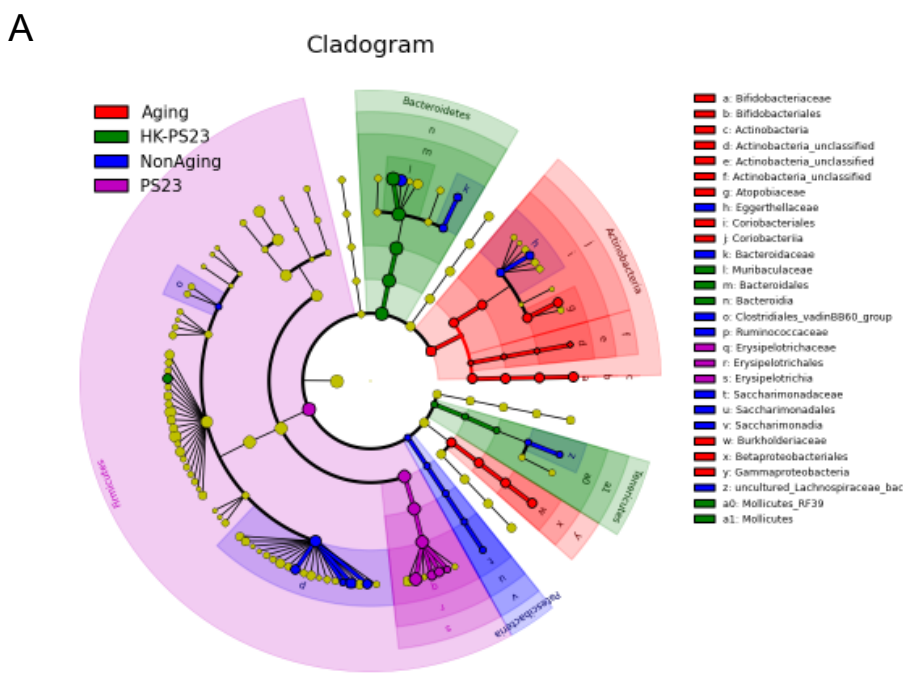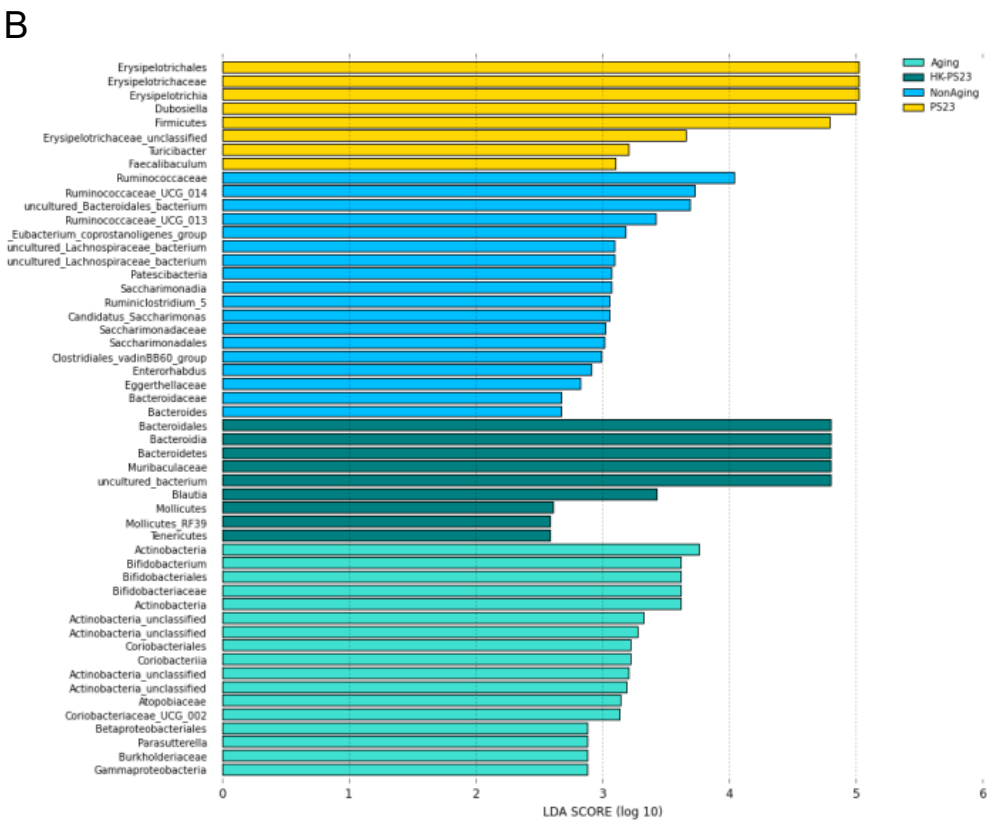

The microbial changes data shown by LEfSE cladogram (A) and differential bacteria abundances (B) in different group.
